# Supplementary material for: Helicobacter pylori infection and risk for developing dementia: an evidence-based meta-analysis of case-control and cohort studies
Source: publisher site journal article supplement (doi:10.18632/aging.203571), 2021-09-24
Supplement: Supplementary file [file aging-v13i18-203571-supplementary-material-SD1.pdf]

## SUPPLEMENTARY FIGURES

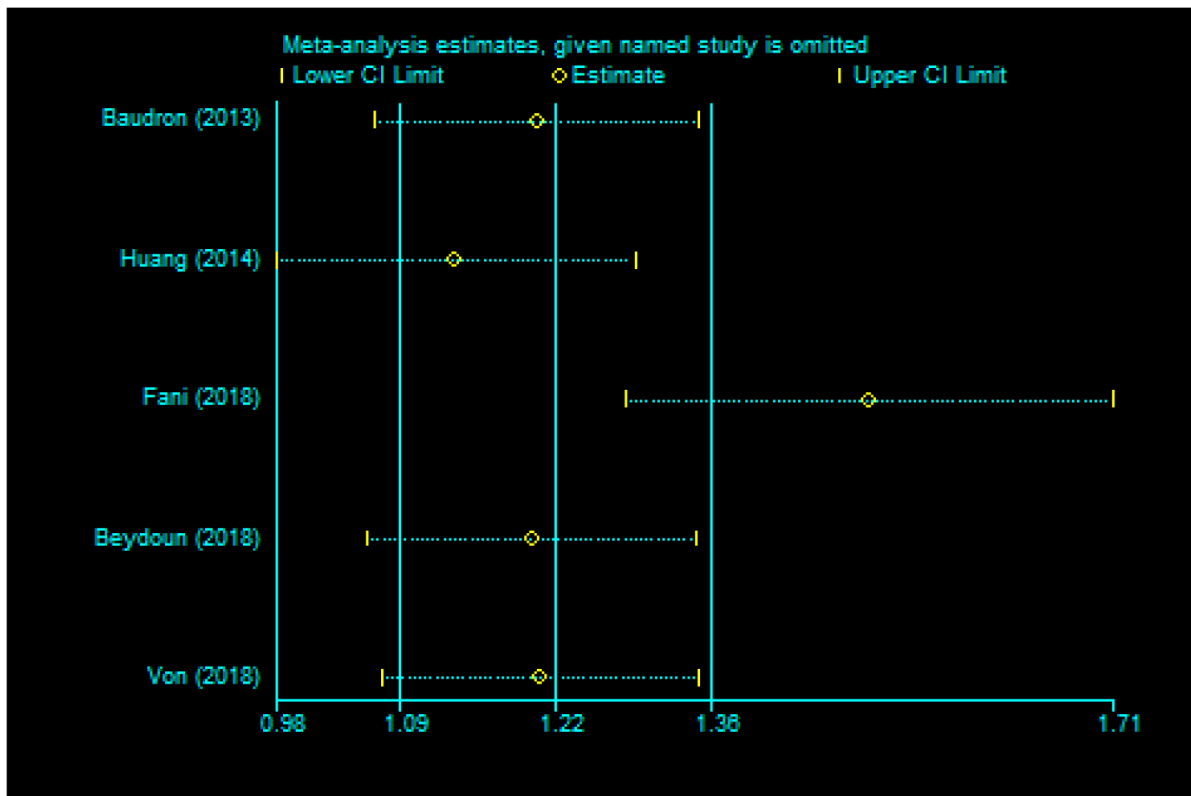

Supplementary Figure 1. Sensitivity analysis of the association between *Helicobacter pylori* infection and all-cause dementia in cohort study.

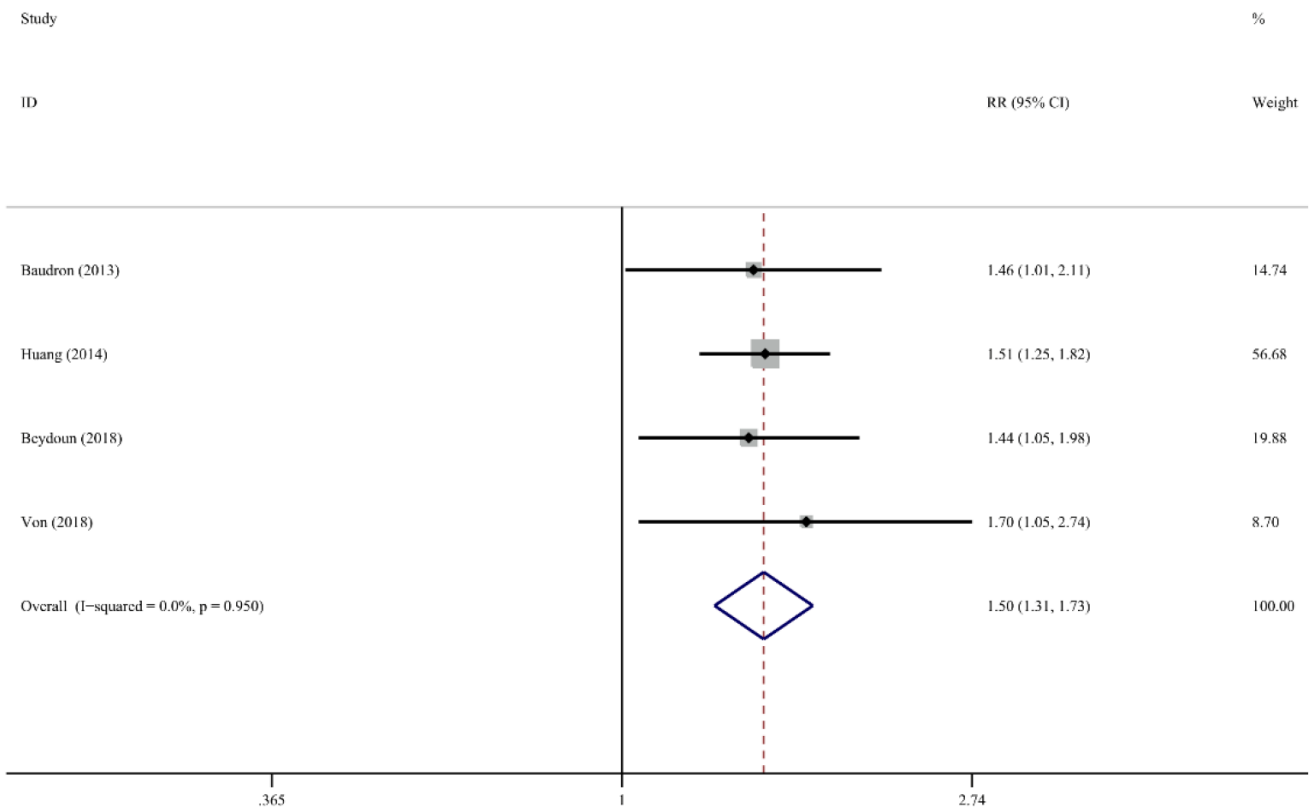

**Supplementary Figure 2. Re-analysing the association between Helicobacter pylori infection and all-cause dementia after excluding the study of Fani et al.**

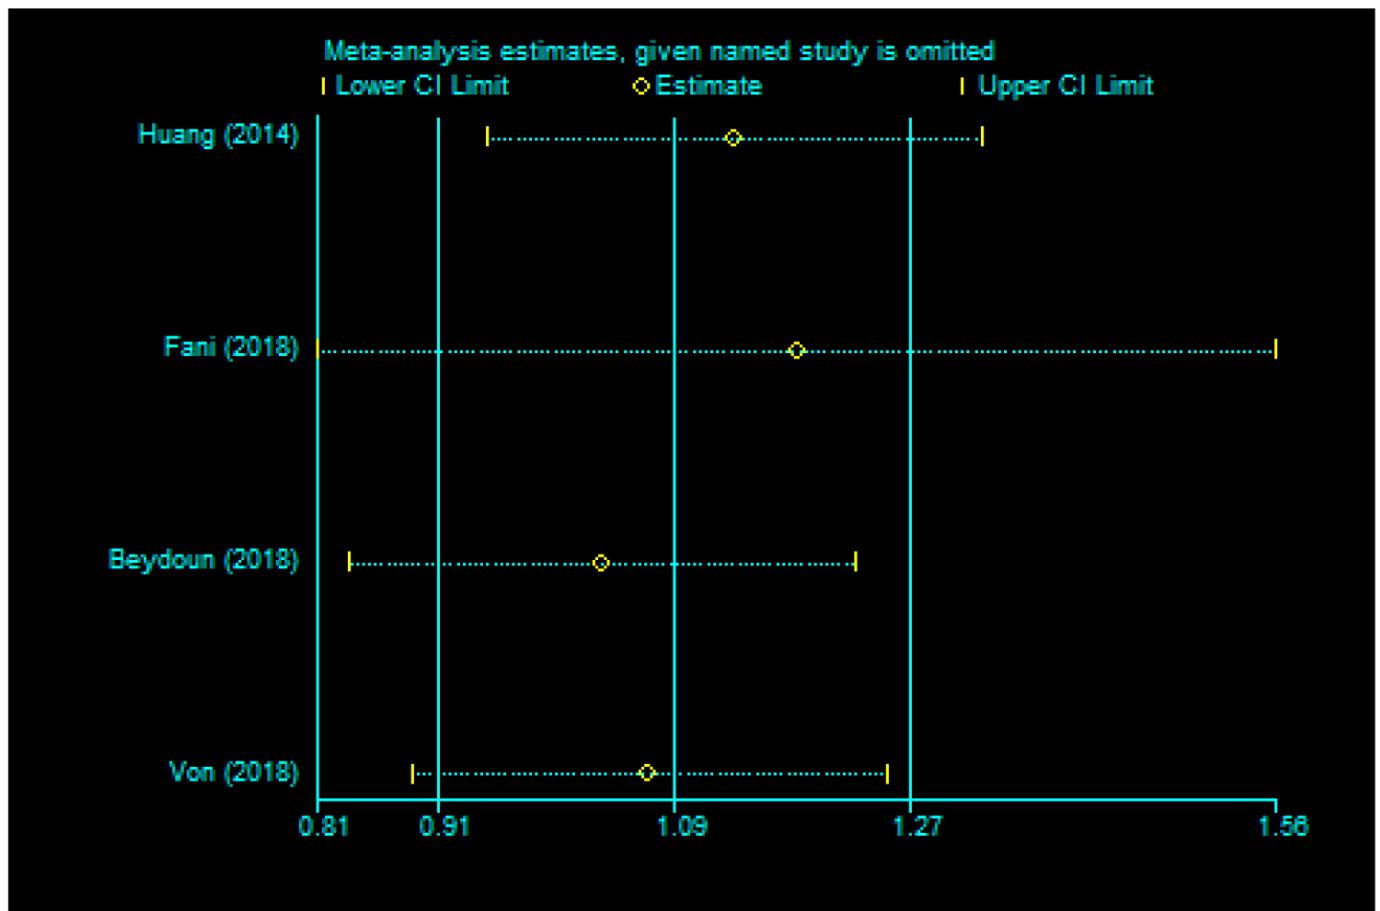

Supplementary Figure 3. Sensitivity analysis of the association between *Helicobacter pylori* infection and AD in cohort study.

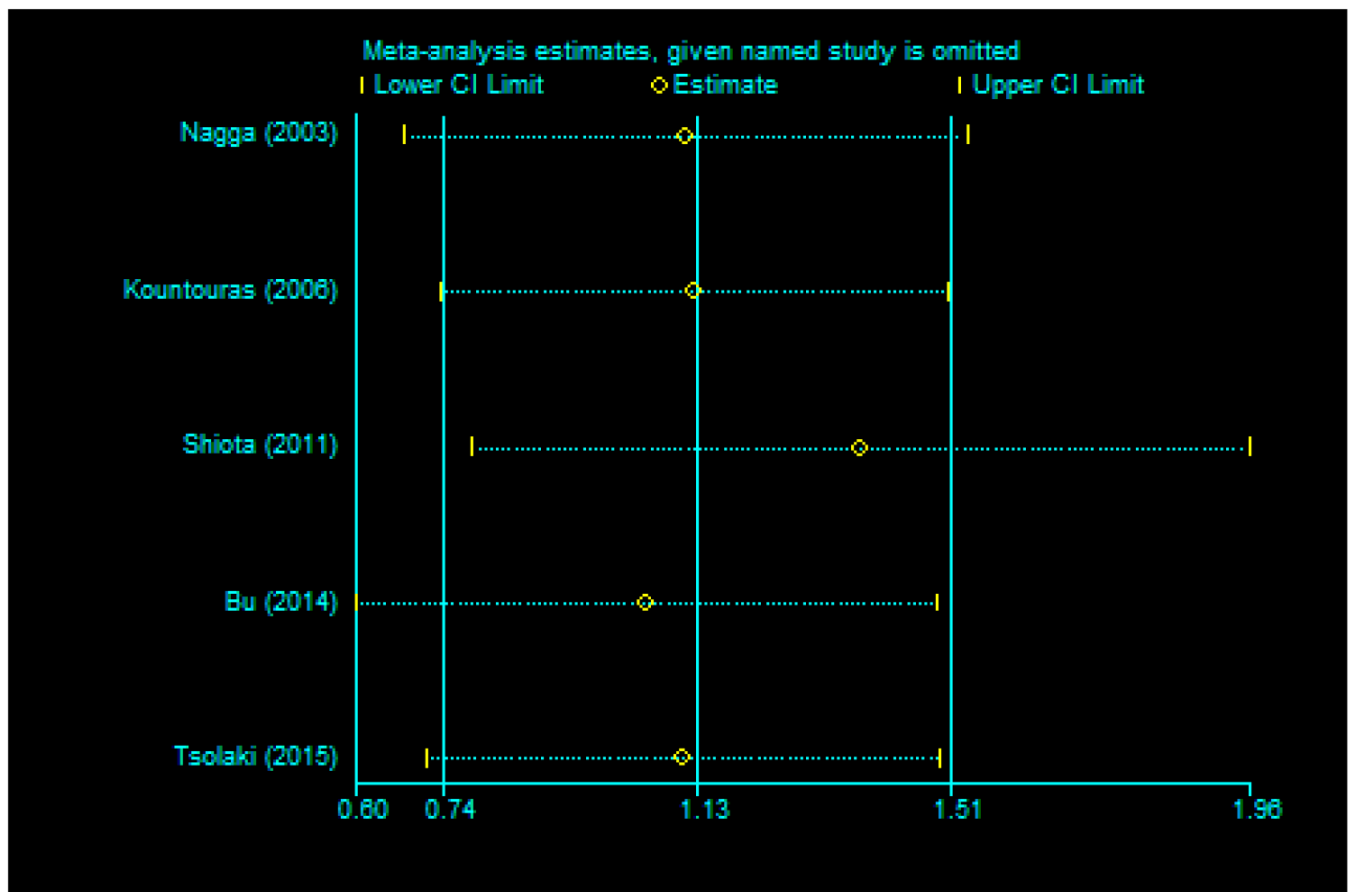

Supplementary Figure 4. Sensitivity analysis of the association between *Helicobacter pylori* infection and AD in case-control study.

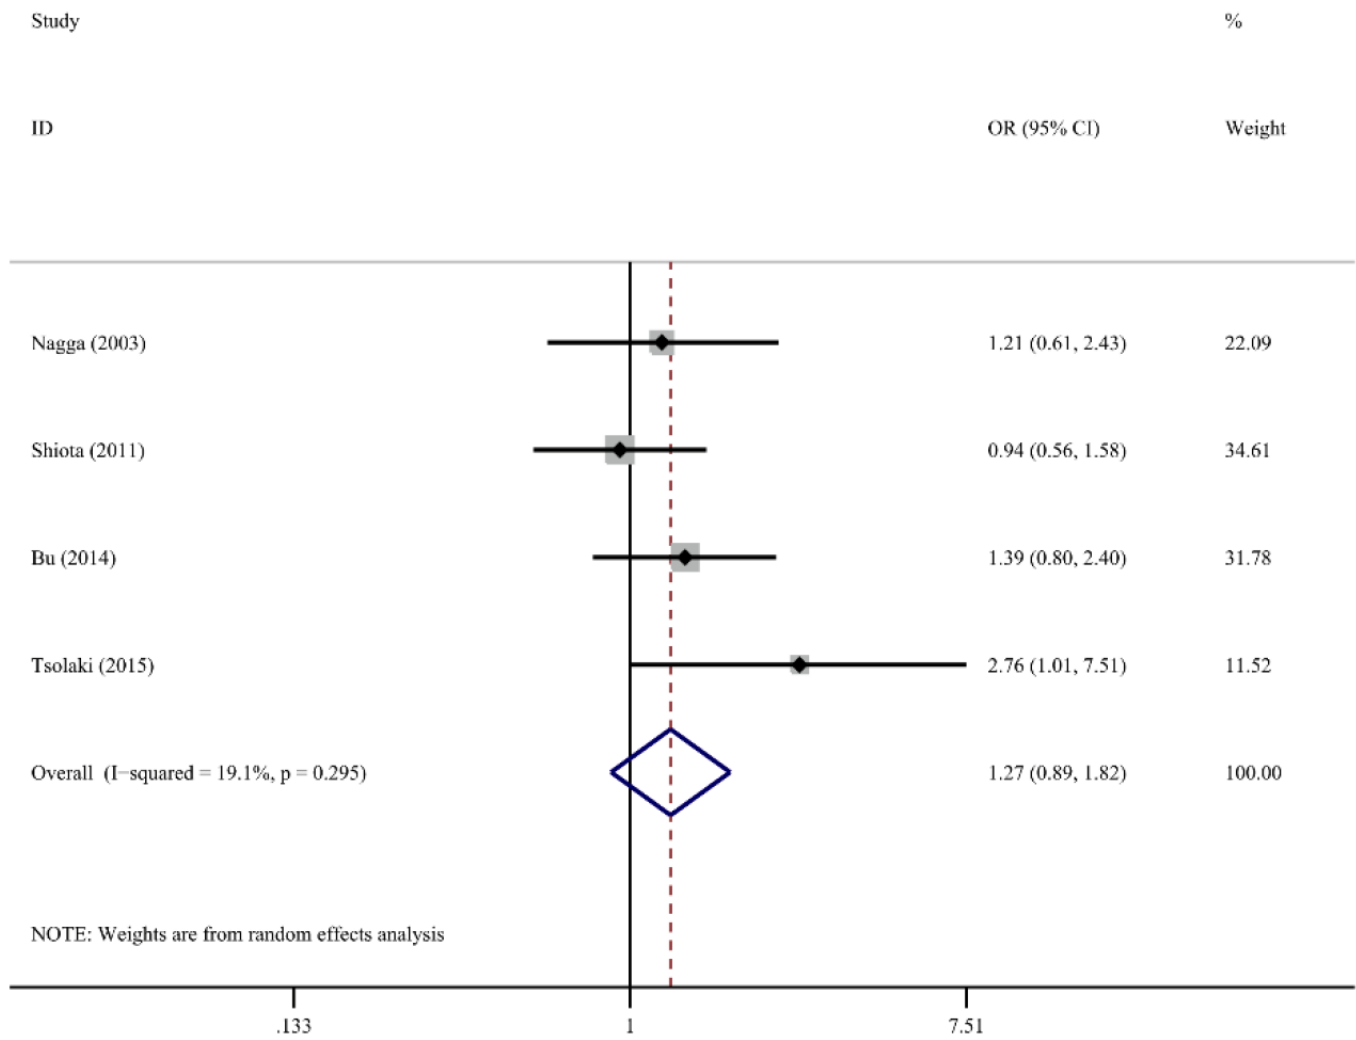

Supplementary Figure 5. Re-analysing the association between *Helicobacter pylori* infection and AD after excluding the study of Kountouras et al.
